## **Correction: RKIP regulates CCL5 expression to inhibit breast cancer invasion and metastasis by controlling macrophage infiltration**

**Ila Datar, Xiaoliang Qiu, Hong Zhi Ma, Miranda Yeung, Shweta Aras, Ivana de la Serna, Fahd Al-Mulla, Jean Paul Thiery, Robert Trumbly, Fan Xuan, Hongjuan Cui, Kam C. Yeung**

Present: Due to an error made by the authors while submitting a revision, Dr. Tuan Zea Tan was omitted from the list of authors.

Corrected: Correct author list can be found below. Authors sincerely apologize for this oversight.

Original article: Oncotarget. 2015; 6(36): 39050-61. doi: 10.18632/oncotarget.5176.

**Ila Datar<sup>1</sup>, Xiaoliang Qiu<sup>1</sup>, Hong Zhi Ma<sup>1</sup>, Miranda Yeung<sup>1</sup>, Shweta Aras<sup>1</sup>, Ivana de la Serna<sup>1</sup>, Fahd Al-Mulla<sup>2</sup>, Tuan Zea Tan<sup>3</sup>, Jean Paul Thiery<sup>3,4</sup>, Robert Trumbly<sup>1</sup>, Fan Xuan<sup>5</sup>, Hongjuan Cui<sup>5</sup> and Kam C. Yeung<sup>1</sup>**

<sup>1</sup> Department of Biochemistry and Cancer Biology, University of Toledo, College of Medicine, Health Science Campus, Toledo, OH, USA

<sup>2</sup> Kuwait University, Faculty of Medicine, Safat, Kuwait

<sup>3</sup> Cancer Science Institute of Singapore National University of Singapore, Center for Translational Medicine, Singapore, Singapore

<sup>4</sup> Department of Biochemistry, Yong Loo Lin School of Medicine, National University of Singapore, Singapore, Singapore

<sup>5</sup> State Key Laboratory Of Silkworm Genome Biology, Chongqing, China
